# Supplementary material
Source: PubMed Central journal article supplement (PMC3082982)

## **Predicting relapse in medulloblastoma patients by integrating evidence from clinical and genomic features**

Tamayo et al

Data Supplement

Table S1. Clinical characteristics of patients in the training and test datasets.

Table S2. Disease-subtype expression signatures used to predict disease-subtype in the test set.

Figure S1. Kaplan-Meier survival plots and ROC curves for the Pomeroy et al. 2002 signature in the training and test sets.

Figure S2. Set of 36 expression signatures used to predict disease-subtype in test samples. Six expression signatures were chosen from the top 10 according to the au-ROC scores for each disease-subtype  $\{c_1, \dots, c_6\}$ .

Figure S3. Heat map of the top 20 disease-independent expression signatures that discriminate relapse vs. no-relapse according to the au-ROC in the training dataset. We selected c-Myc as the representative disease-independent expression signatures to be used in the model.

Figure S4. Heat map of the top 20 (bottom 20) disease-dependent pathways that discriminate relapse vs. no-relapse according to the au-ROC for each disease-subtype  $\{c_1, \dots, c_6\}$  in the training dataset. The boxes show the ones we selected to be representative of disease-independent expression signatures to be used in the model.

Figure S5. Kaplan-Meier plots and log-rank test p-values of the associated rank test for the current clinical schema and Models A-D in: A) the training set, and B) the test set. The 95% confidence intervals are shown in blue.

Figure S6. Relative utility curves for Models A-D in the training and test sets. The plots show the relative utility, i.e., the fraction of the utility of perfect prediction that is achieved at the optimal cut point for a risk prediction model, vs. risk threshold. We note that the curves for Models C and D overlap for both the train and test sets.

Figure S7. Full Bayesian nomogram showing all the arms corresponding to disease-subtype dependent expression signatures conditional to the disease-subtype. A specific instance of this nomogram populated with the features of one patient is shown on Fig 3.

Figure S8. Flow-chart of the entire model methodology showing the steps that have to be performed for the analysis of training and test samples. The orange and pink squares represent experimental procedures, and the blue squares represent computational steps. The green squares represent datasets or computational models.

**TABLE S1**

| <b>Attribute</b>            | <b>Training Dataset</b> | <b>Test Dataset</b> |
|-----------------------------|-------------------------|---------------------|
| Number of Samples           | 96                      | 78                  |
| Sex                         |                         |                     |
| Female                      | 38.5%                   | 30.8%               |
| Male                        | 61.5%                   | 69.2%               |
| Relapse                     |                         |                     |
| No                          | 57.3%                   | 56.4%               |
| Yes                         | 42.7%                   | 43.6%               |
| Status                      |                         |                     |
| Alive                       | 67.7%                   | 66.7%               |
| Deceased                    | 30.2%                   | 33.3%               |
| Unknown                     | 2.1%                    | -                   |
| Average Age (months)        | 107.4 ± 69.9            | 105.6 ± 88.3        |
| Histology                   |                         |                     |
| Classic                     | 67.7%                   | 71.8%               |
| Desmoplastic                | 13.5%                   | 17.9%               |
| LGA (Large Cell Anaplastic) | 16.7%                   | -                   |
| Unknown                     | 2.10%                   | 10.3%               |
| Metastasis                  |                         |                     |
| M0                          | 75.0%                   | 66.7%               |
| M1                          | 3.12%                   | 8.97%               |
| M2                          | 2.08%                   | 2.56%               |
| M3                          | 9.38%                   | 12.8%               |
| M4                          | -                       | 2.18%               |
| M+                          | 2.08%                   | 2.56%               |
| Unknown                     | 8.33%                   | -                   |
| Risk                        |                         |                     |
| Standard                    | 60.4%                   | 65.3%               |
| High                        | 30.2%                   | 28.2%               |
| Unknown                     | 9.40%                   | 6.5%                |

**TABLE S2**

| Feature                                                      | Subtype        | Description                                                                                                              | Database       |
|--------------------------------------------------------------|----------------|--------------------------------------------------------------------------------------------------------------------------|----------------|
| <b>Expression Signatures Used to Predict Disease-Subtype</b> |                |                                                                                                                          |                |
| TRANSLATION_FACTORS                                          | C <sub>1</sub> | Translation factor genes (52) GenMAPP                                                                                    | MSigDB v2.5/C2 |
| BRCA_BRCA1_POS                                               | C <sub>1</sub> | Genes whose expression is consistently positively correlated with brca1 germline status (107)                            | MSigDB v2.5/C2 |
| FLUMAZENILPATHWAY                                            | C <sub>1</sub> | Flumazenil pathway (9 genes)                                                                                             | MSigDB v2.5/C2 |
| AGUIRRE_PANCREAS_CHR8                                        | C <sub>1</sub> | Genes (61) on chr with copy-number-driven expression in pancreatic adenocarcinoma.                                       | MSigDB v2.5/C2 |
| MENSSEN_MYC_UP                                               | C <sub>1</sub> | Genes (34) up-regulated by MYC in HUVEC (umbilical vein endothelial cell)                                                | MSigDB v2.5/C2 |
| PENG_RAPAMYCIN_DN                                            | C <sub>1</sub> | Genes (229) downregulated in response to rapamycin starvation                                                            | MSigDB v2.5/C2 |
| DSRNA_UP/DN                                                  | C <sub>2</sub> | Upregulated (38) and downregulated (15) by dsRNA (polyI:C) in IFN-null GRE cells                                         | MSigDB v2.5/C2 |
| HINATA_NFKB_DN                                               | C <sub>2</sub> | Genes (25) downregulated by NF-kappa B                                                                                   | MSigDB v2.5/C2 |
| P53_DN.v2                                                    | C <sub>2</sub> | Genes upregulated (150) and downregulated (150) in siRNA knockdown of p53 (GEO dataset GDS1852).                         | OPAM.v3        |
| IL22BPPATHWAY                                                | C <sub>2</sub> | IL-22 (13) is produced by T cells and induces the acute phase inflammatory response in hepatocytes.                      | MSigDB v2.5/C2 |
| ABBUD_LIF_GH3_DN                                             | C <sub>2</sub> | Genes (7) that decreased after LIF treatment of GH3 cells                                                                | MSigDB v2.5/C2 |
| NGUYEN_KERATO                                                | C <sub>2</sub> | Genes concomitantly upregulated (29) and downregulated (86) by activated Notch1 in mouse and human primary keratinocytes | MSigDB v2.5/C2 |
| POMEROY_DESMOPLASIC_VS_CLASSIC_MD_UP                         | C <sub>3</sub> | Genes (47) expressed in desmoplastic medulloblastomas.                                                                   | MSigDB v2.5/C2 |
| HSA04340_HEDGEHOG_SIGNALING_PATHWAY                          | C <sub>3</sub> | Genes (57) involved in Hedgehog signaling pathway                                                                        | MSigDB v2.5/C2 |
| HINATA_NFKB                                                  | C <sub>3</sub> | Genes upregulated (111) and downregulated (21) by NF-kappa B                                                             | MSigDB v2.5/C2 |
| RADAEVA_IFNA_DN                                              | C <sub>3</sub> | Genes (10) down-regulated by interferon-alpha in primary hepatocyte                                                      | MSigDB v2.5/C2 |
| RORIE_ES_PNET_UP                                             | C <sub>3</sub> | Genes (28) showing the greatest increase in expression in NBa Ews/Fli-1 infantants                                       | MSigDB v2.5/C2 |
| SARCOMAS_LIPOSARCOMA                                         | C <sub>3</sub> | Genes upregulated (10) and downregulated (11) in liposarcomas, versus other soft-tissue tumors.                          | MSigDB v2.5/C2 |
| GPCRS_CLASS_C_METABOTROPIC_Glutamate_PHEROMONE               | C <sub>4</sub> | Genes (14) associated with G-protein coupled receptors related to metabotropic glutamate receptors.                      | MSigDB v2.5/C2 |
| DFOSB_BRAIN_2WKS_UP                                          | C <sub>4</sub> | Genes (39) Up-regulated in nucleus accumbens of mice after 2 weeks of induction of transgenic deltaFosB                  | MSigDB v2.5/C2 |
| PARKINPATHWAY                                                | C <sub>4</sub> | Genes (12) associated with Parkinson's disease                                                                           | MSigDB v2.5/C2 |
| HSA05020_PARKINSONS_DISEASE                                  | C <sub>4</sub> | Genes (17) involved in Parkinson's disease                                                                               | MSigDB v2.5/C2 |
| MITRPATHWAY                                                  | C <sub>4</sub> | Genes (9) associated with the MyoD/MEF2 transcription factors                                                            | MSigDB v2.5/C2 |
| HSA04080_NEUROACTIVE_LIGAND_RECEPTOR_INTERACTION             | C <sub>4</sub> | Genes (254) involved in neuroactive ligand-receptor interaction                                                          | MSigDB v2.5/C2 |
| PHOTO_DN.v1                                                  | C <sub>5</sub> | Photoreceptor upregulated (150) and downregulated (150) genes (Cepko et al. 2007 <sup>1</sup> )                          | OPAM.v3        |
| CRX_DN.v1                                                    | C <sub>5</sub> | CRX -/- upregulated (150) and downregulated (150) genes (Cepko et al. 2007 <sup>1</sup> )                                | OPAM.v3        |
| CtIP_DN.v1                                                   | C <sub>5</sub> | CtIP -/- upregulated (150) and downregulated (150) genes (GEO dataset GDS2189 )                                          | OPAM.v3        |
| NRL_DN.v1                                                    | C <sub>5</sub> | NRL -/- upregulated (150) and downregulated (150) genes (Cepko et al. 2007 <sup>1</sup> )                                | OPAM.v3        |
| WNT_UP.v1                                                    | C <sub>5</sub> | Genes upregulated (200) and downregulated (200) by wnt (GEO dataset GSE1899).                                            | OPAM.v3        |
| CHREBPPATHWAY                                                | C <sub>5</sub> | Genes (20) associated with chREBP, a transcription factor inhibited by cAMP                                              | MSigDB v2.5/C2 |
| NEUROTRANSMITTERSPATHWAY                                     | C <sub>6</sub> | Genes (6) associated with biosynthesis of neurotransmitters                                                              | MSigDB v2.5/C2 |
| BCAT_UP.v1_UP                                                | C <sub>6</sub> | Genes (200) upregulated by beta-catenin (GEO dataset GDS748)                                                             | OPAM.v3        |
| ST_WNT_BETA_CATENIN_PATHWAY                                  | C <sub>6</sub> | Genes (34) associated with Wnt/Beta-catenin signaling.                                                                   | MSigDB v2.5/C2 |
| LEF1_UP.v1_UP                                                | C <sub>6</sub> | Genes (200) upregulated by Lef1 (GEO dataset GSE3229)                                                                    | OPAM.v3        |
| TGFBETA_LATE_UP                                              | C <sub>6</sub> | Genes (33) upregulated by TGF-beta treatment of skin fibroblasts only at 1-4 hrs (clusters 4-6)                          | MSigDB v2.5/C2 |
| UVB_NHEK3_C6                                                 | C <sub>6</sub> | Genes (30) regulated by UV-B light in normal human epidermal keratinocytes, cluster 6                                    | MSigDB v2.5/C2 |

1. Corbo JC, Myers CA, Lawrence KA, et al: A typology of photoreceptor gene expression patterns in the mouse. Proc Natl Acad Sci U S A 104:12069-74, 2007

Figure S1

Pomeroy et al. 2002 8-gene outcome signature

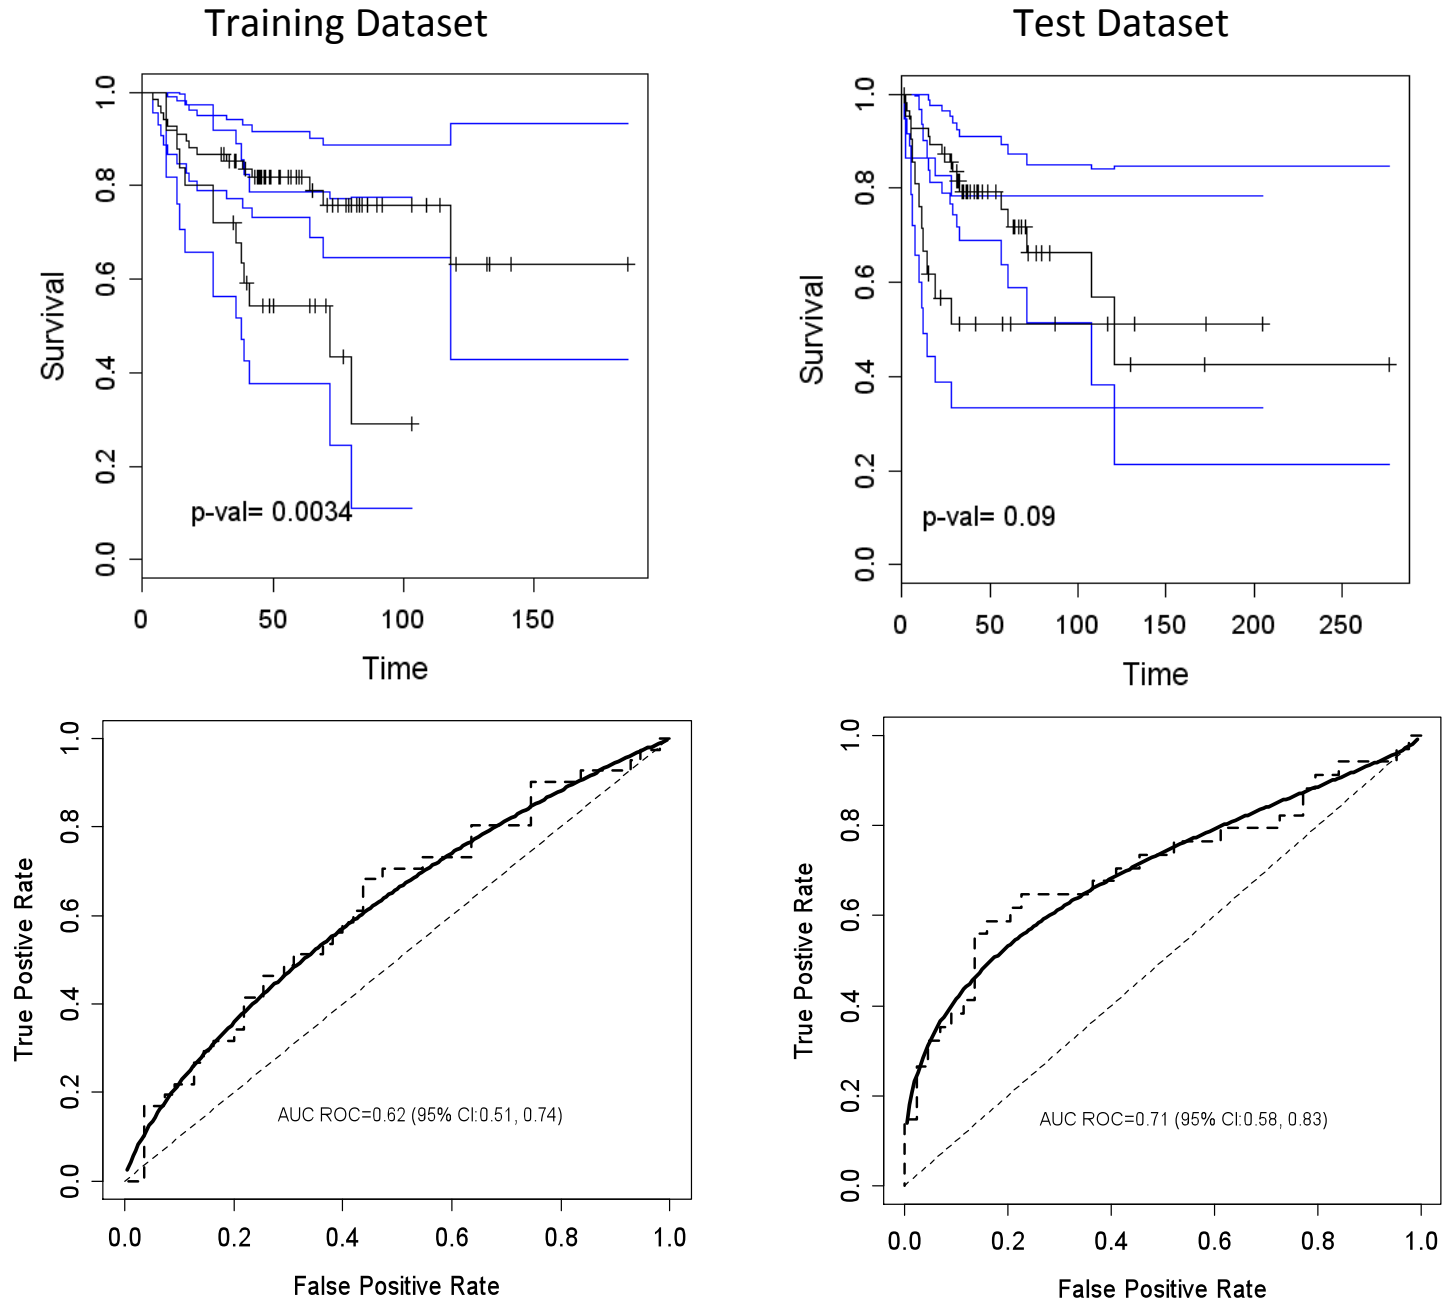

Figure S2

### Expression Signatures that Predict Disease-Subtype - Training Set

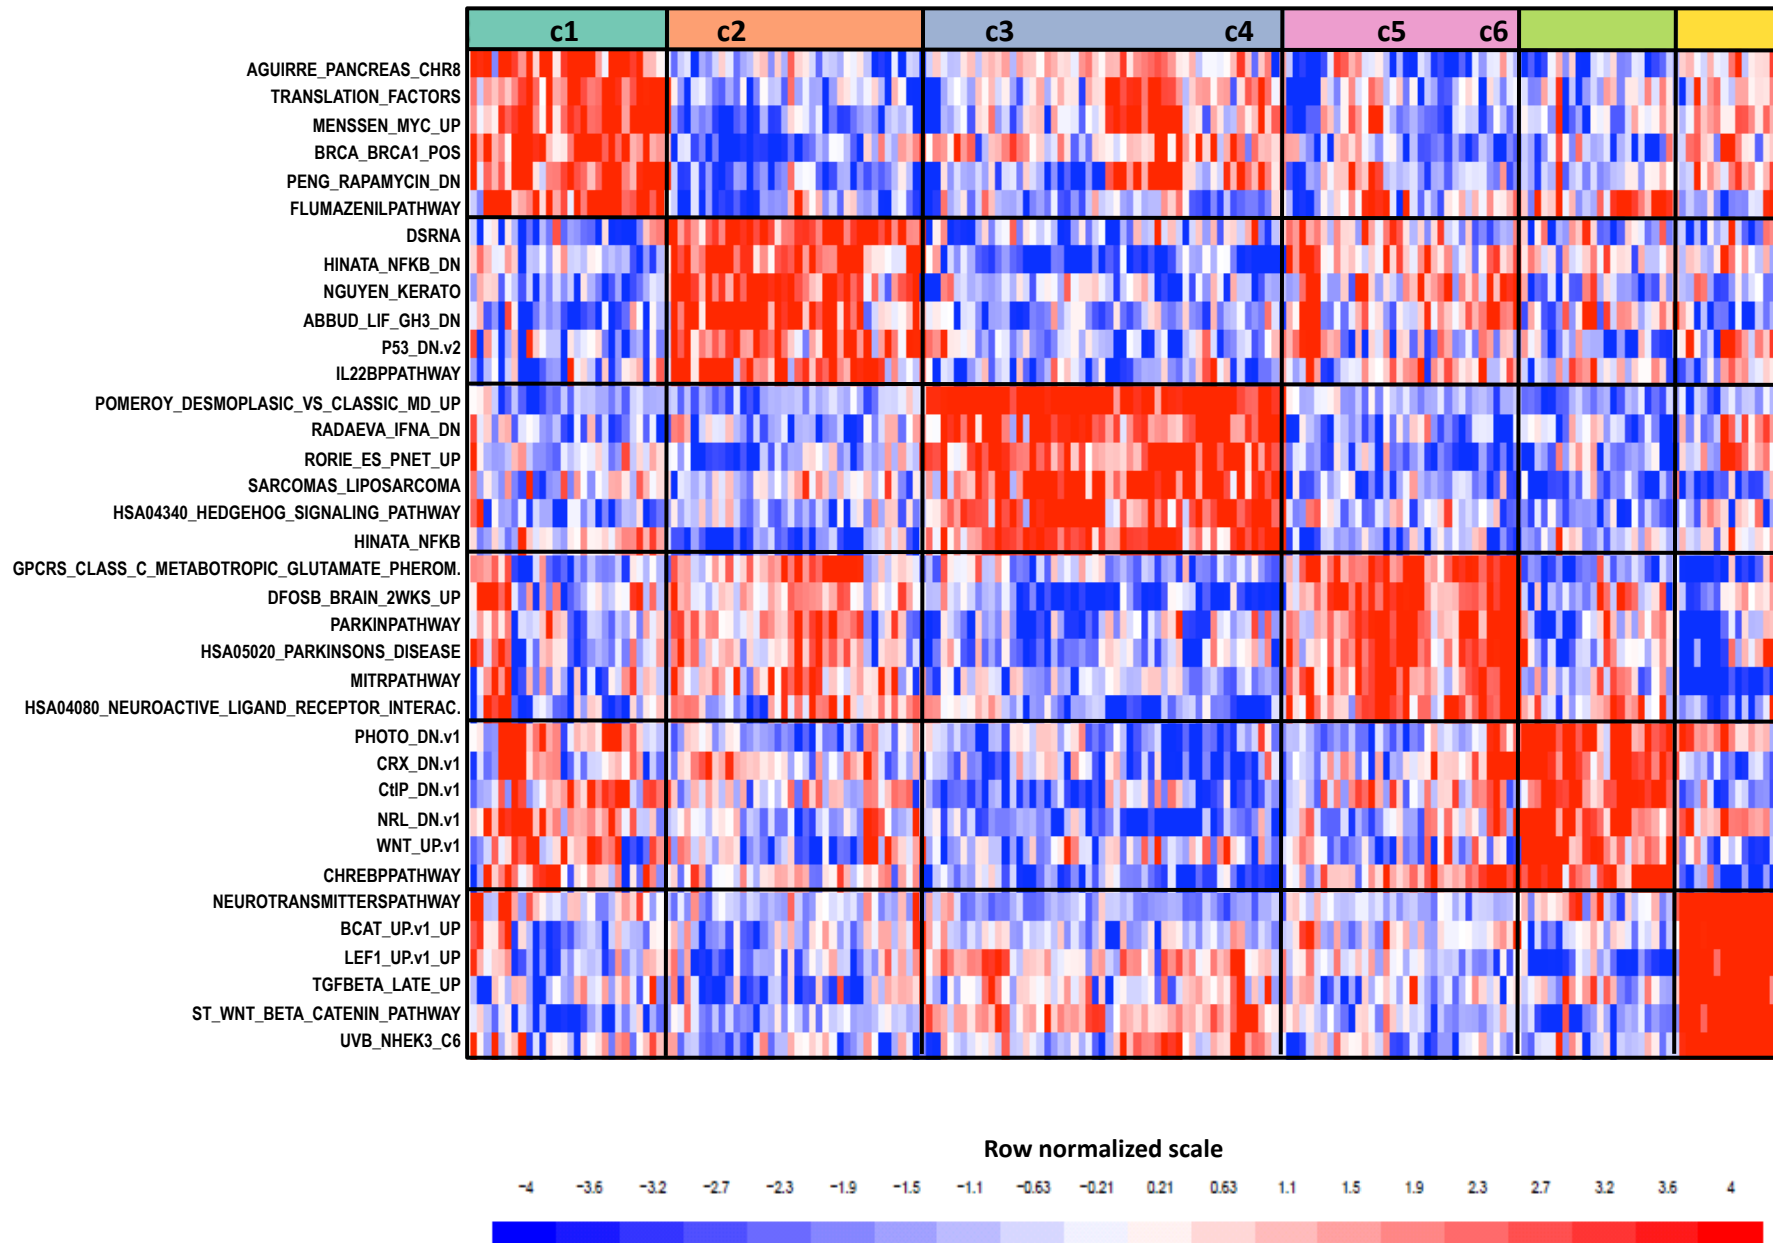

Figure S3

# Disease-Subtype Independent Expression Signature Training Set

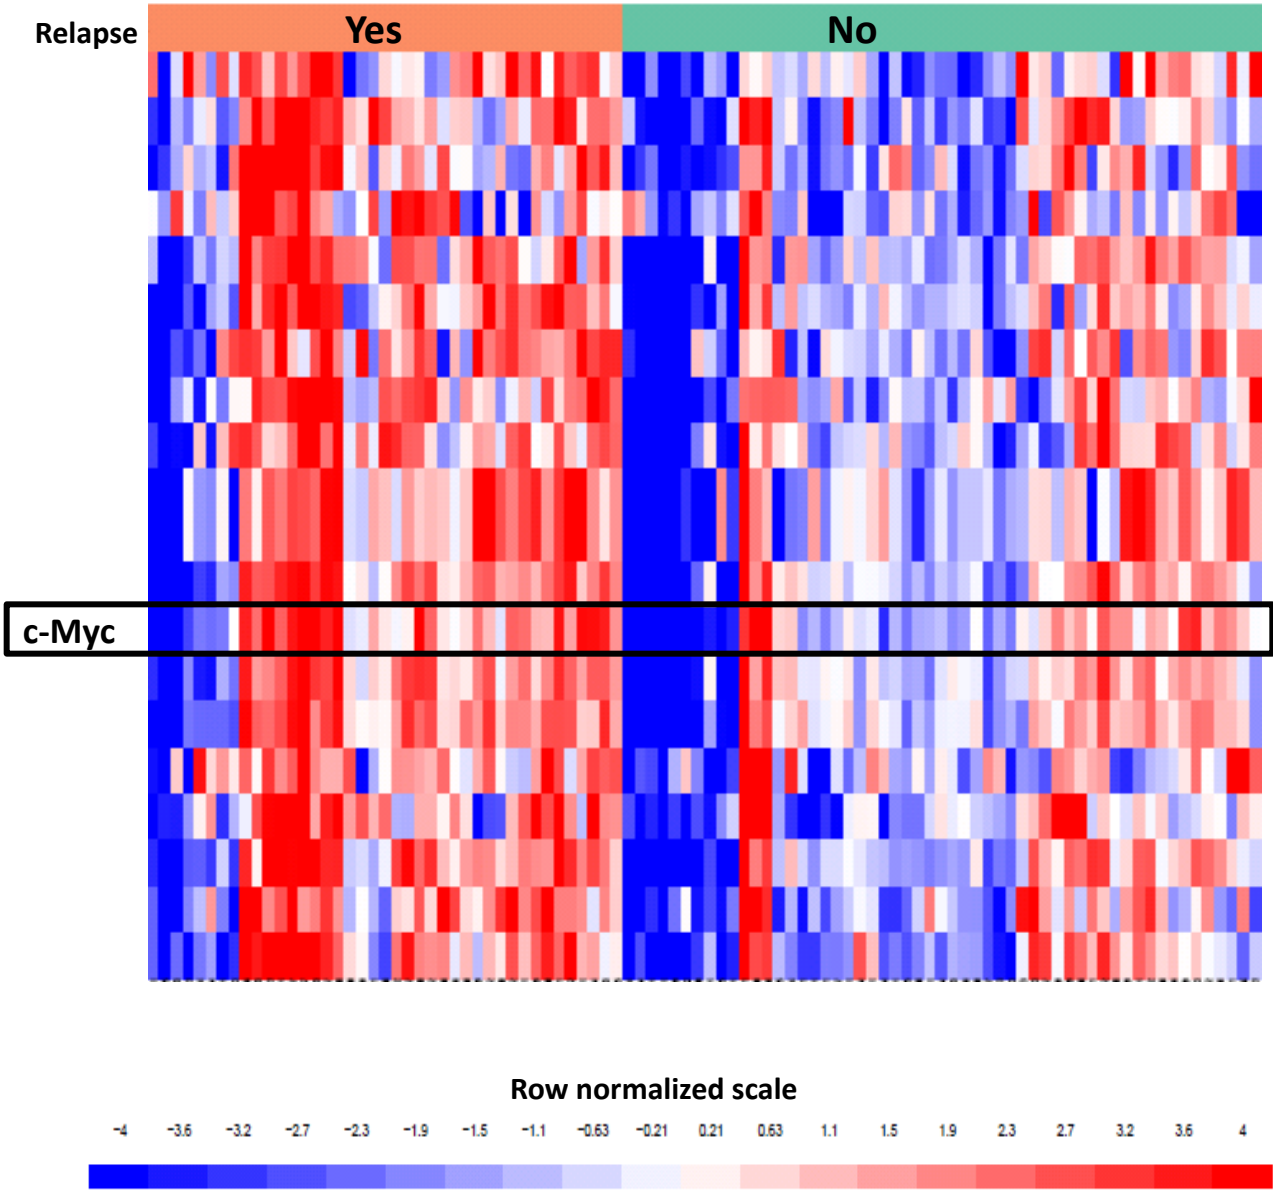

Figure S4

# Disease-Subtype Dependent Expression Signatures - Training Set

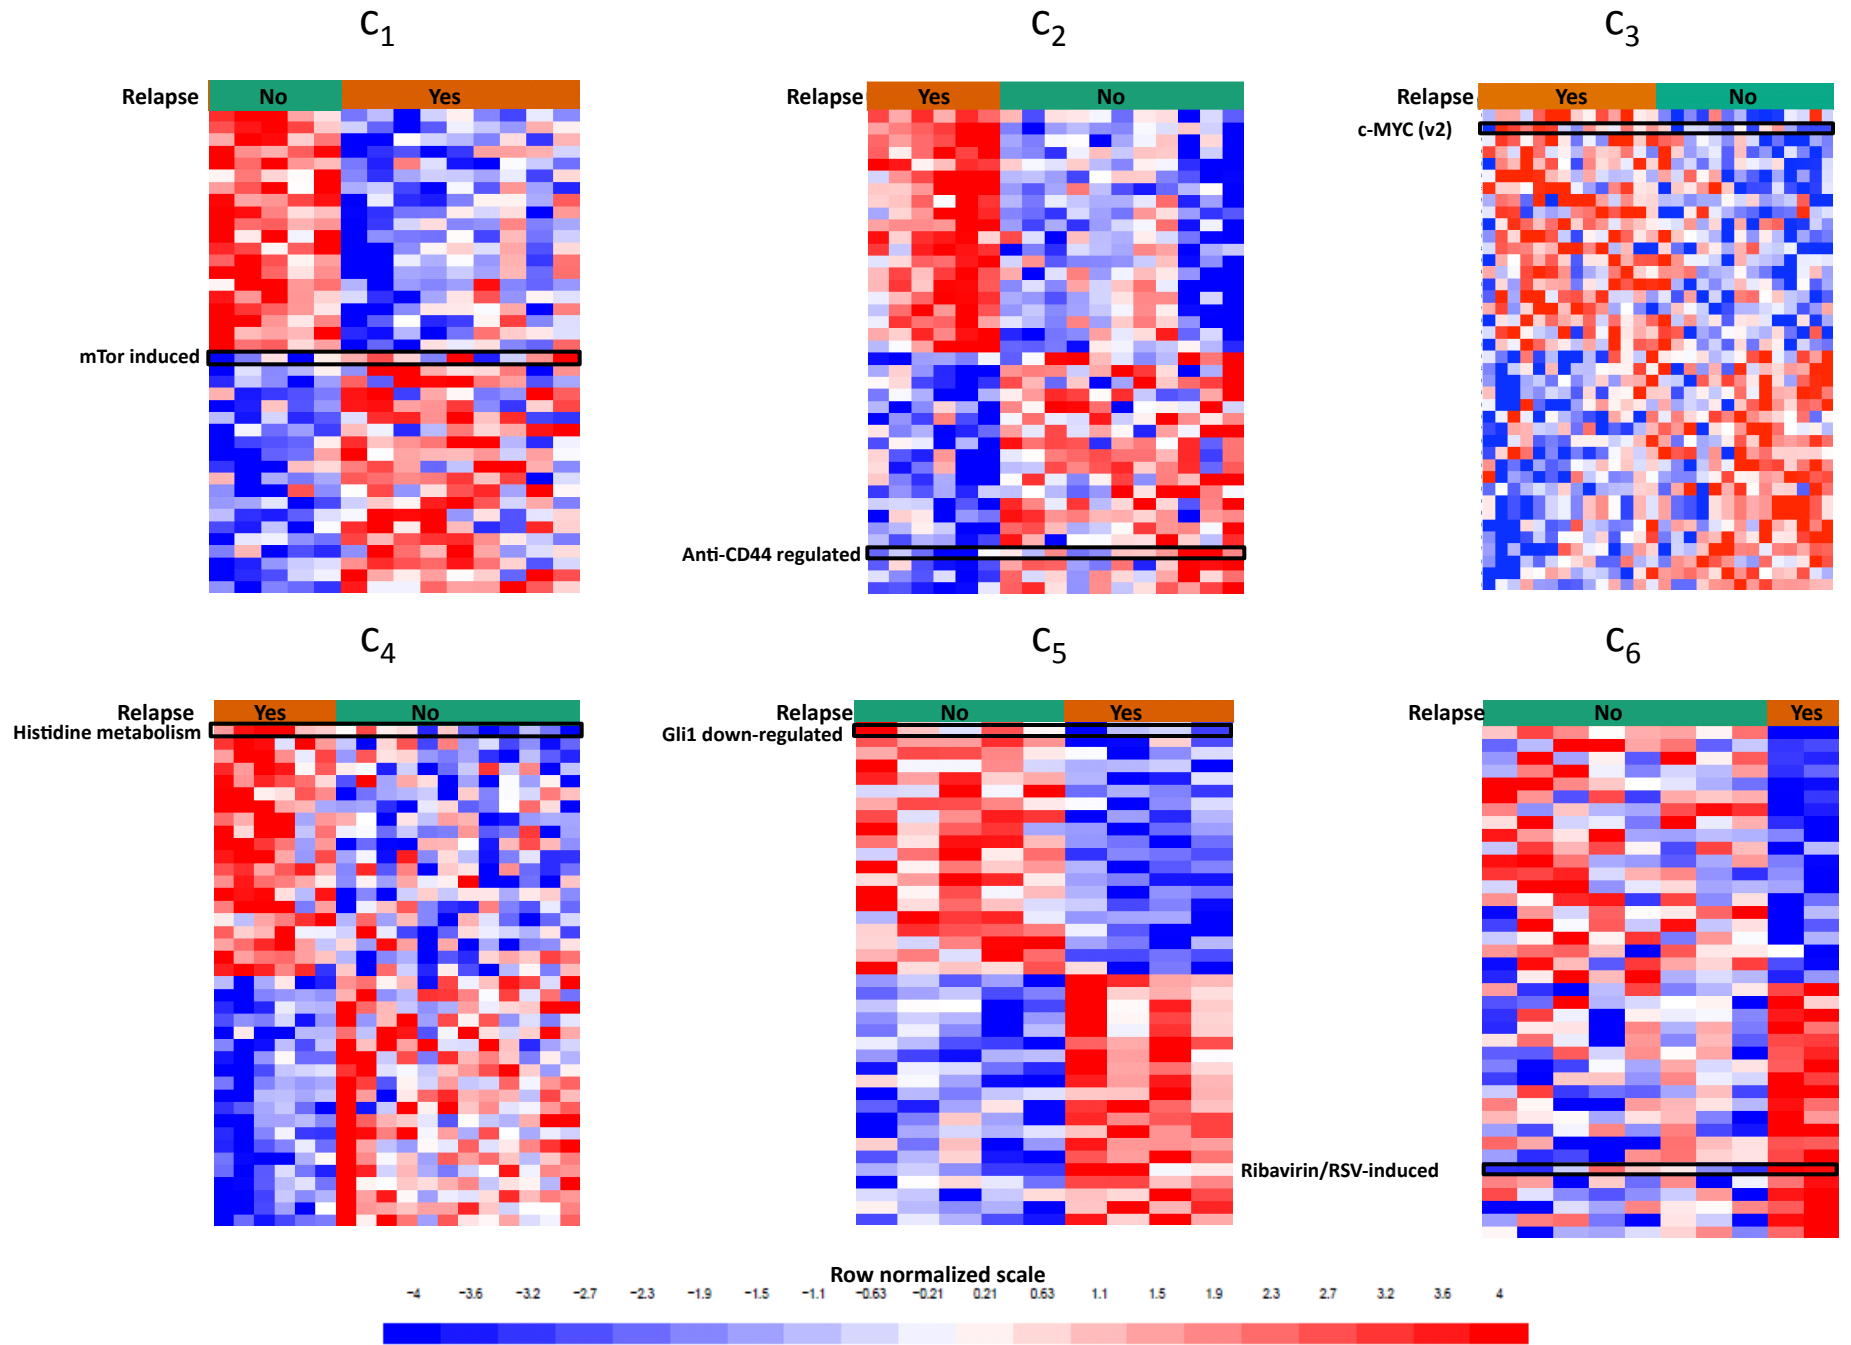

Figure S5-A

Training Set

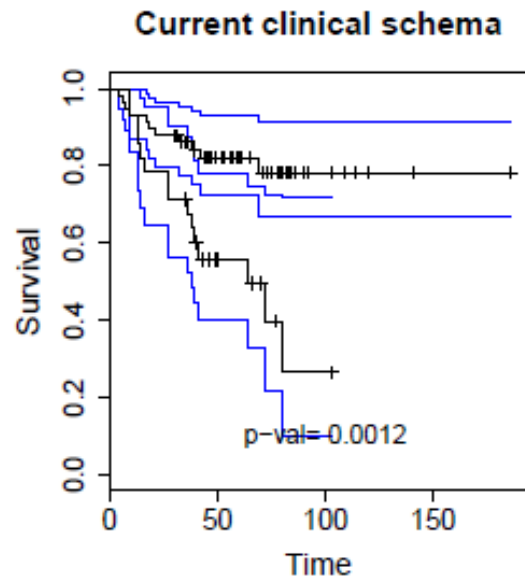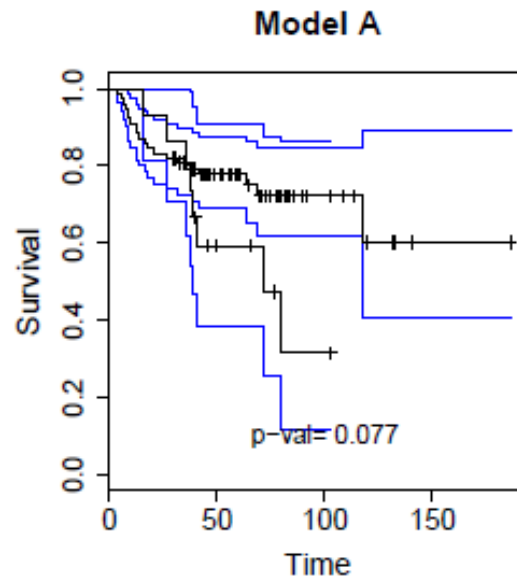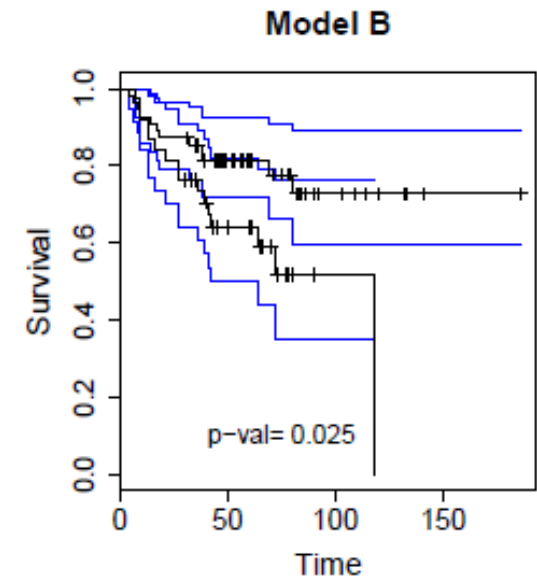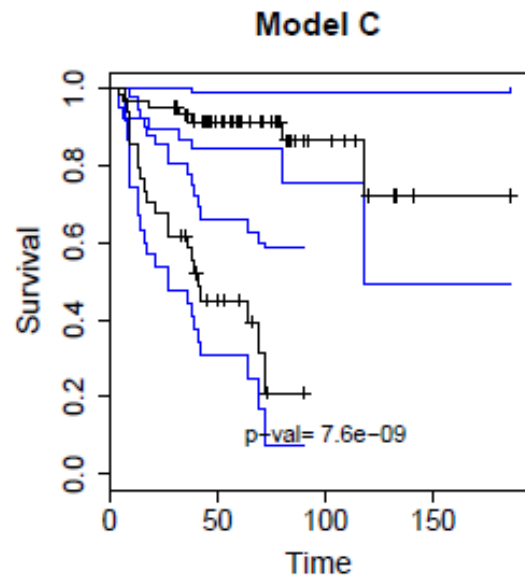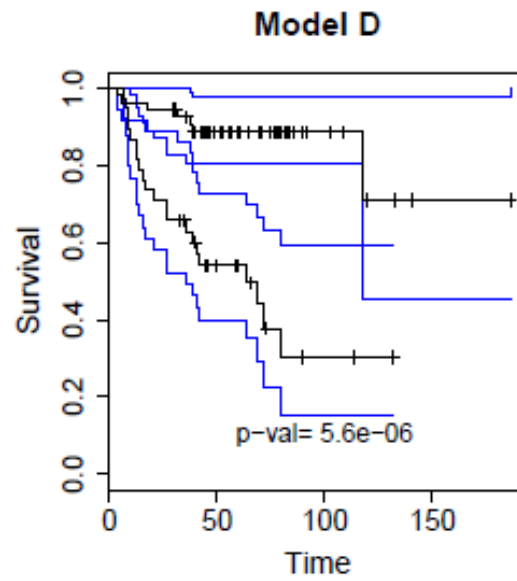



Figure S5-B

Test Set

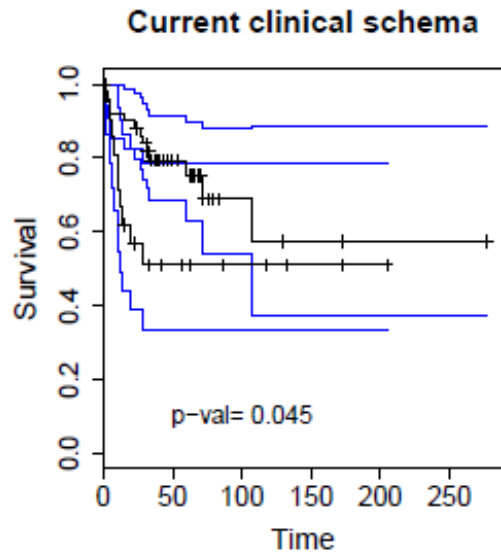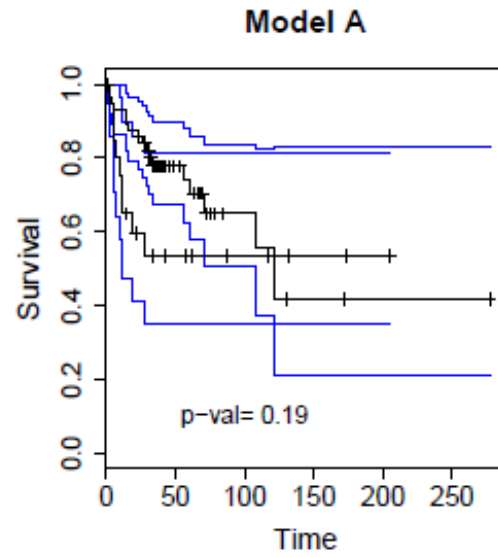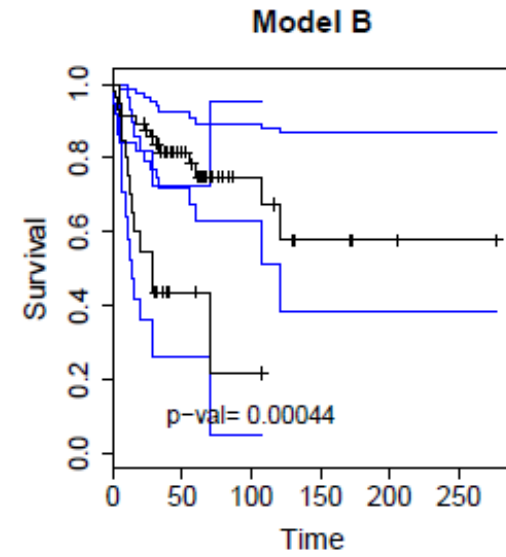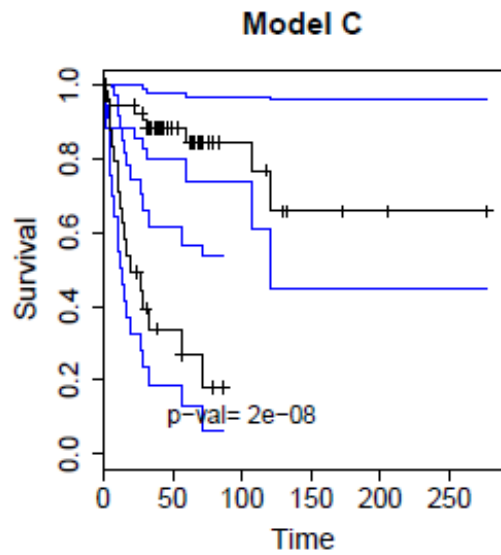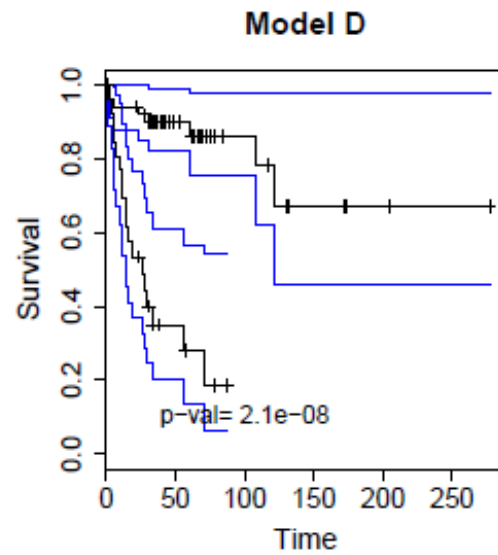



Figure S7

# Full Bayesian Nomogram

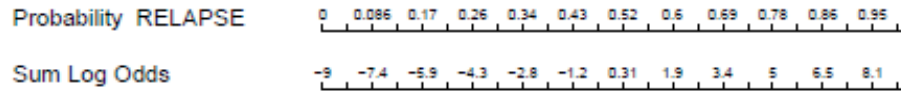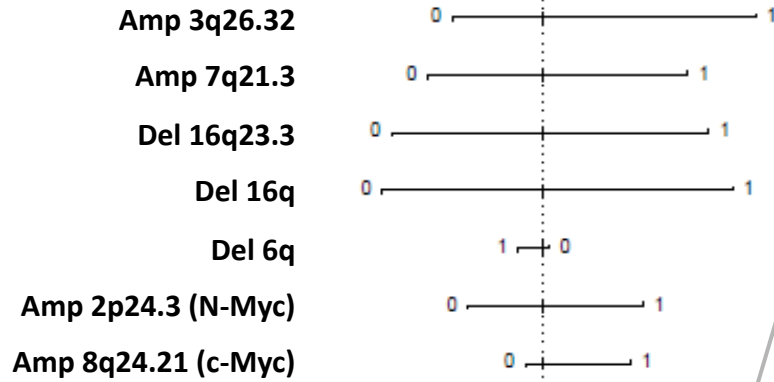

Disease-Subtype Dependent Pathways

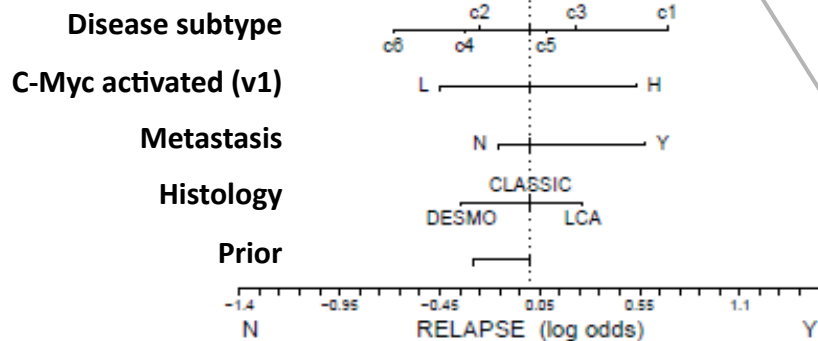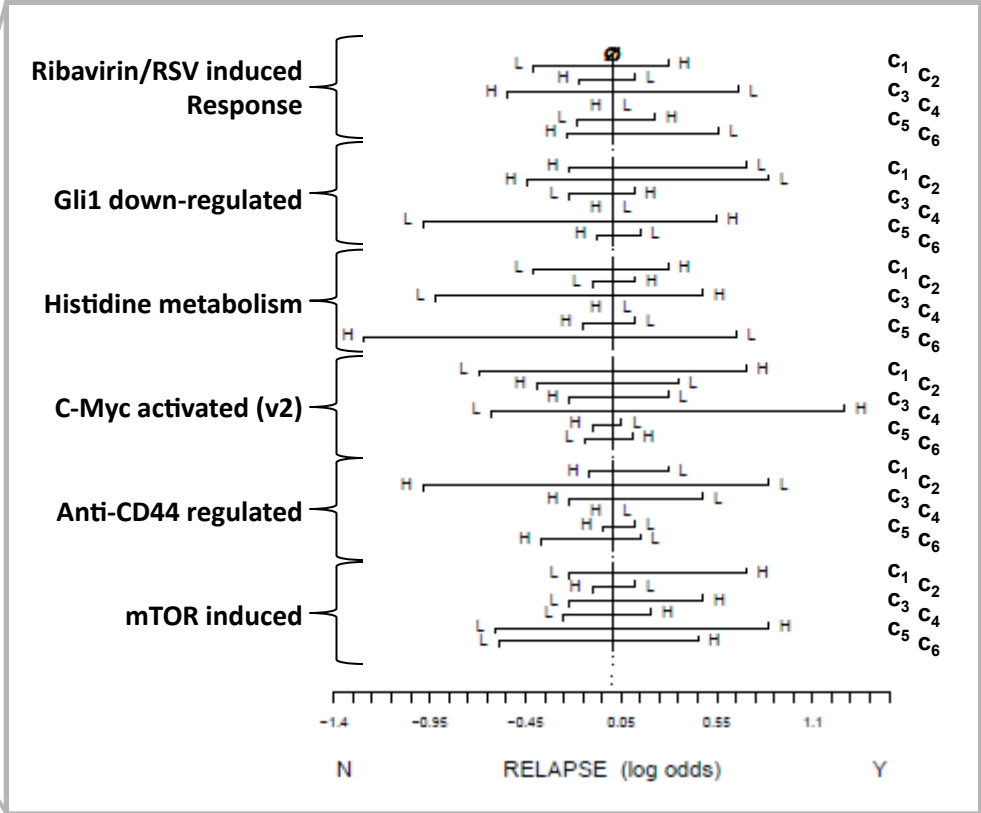

Figure S8

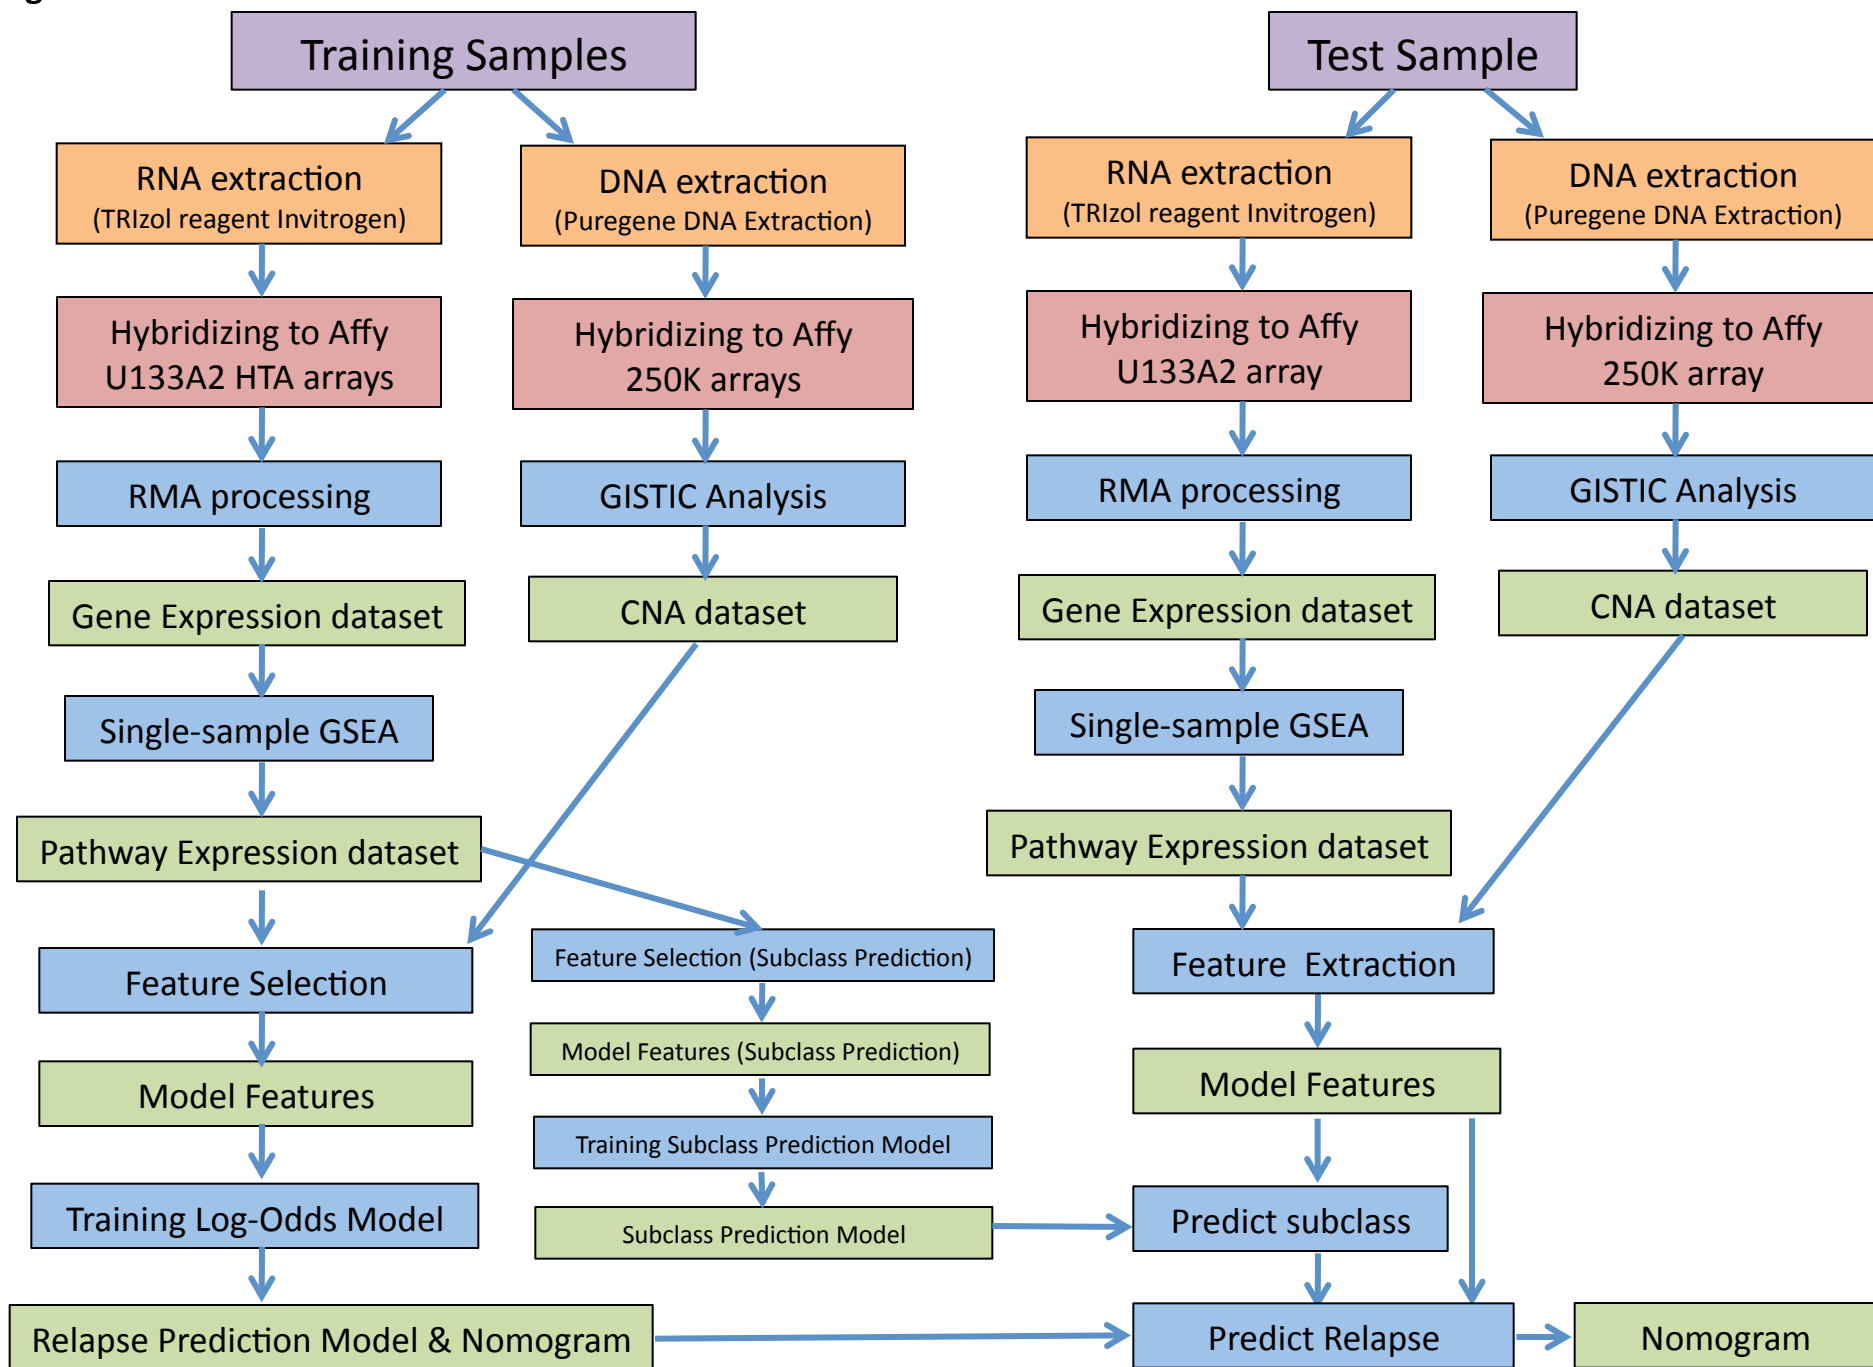

Supplement: supp_JCO.2010.28.1675_supplemental_tables_and_figures.pdf [file supp_JCO.2010.28.1675_supplemental_tables_and_figures.pdf]
